# Supplementary material
Source: PubMed Central journal article supplement (PMC7346704)
Supplement: NIHMS1566167-supplement-Supplemental_Figure_3.pdf [file NIHMS1566167-supplement-Supplemental_Figure_3.pdf]

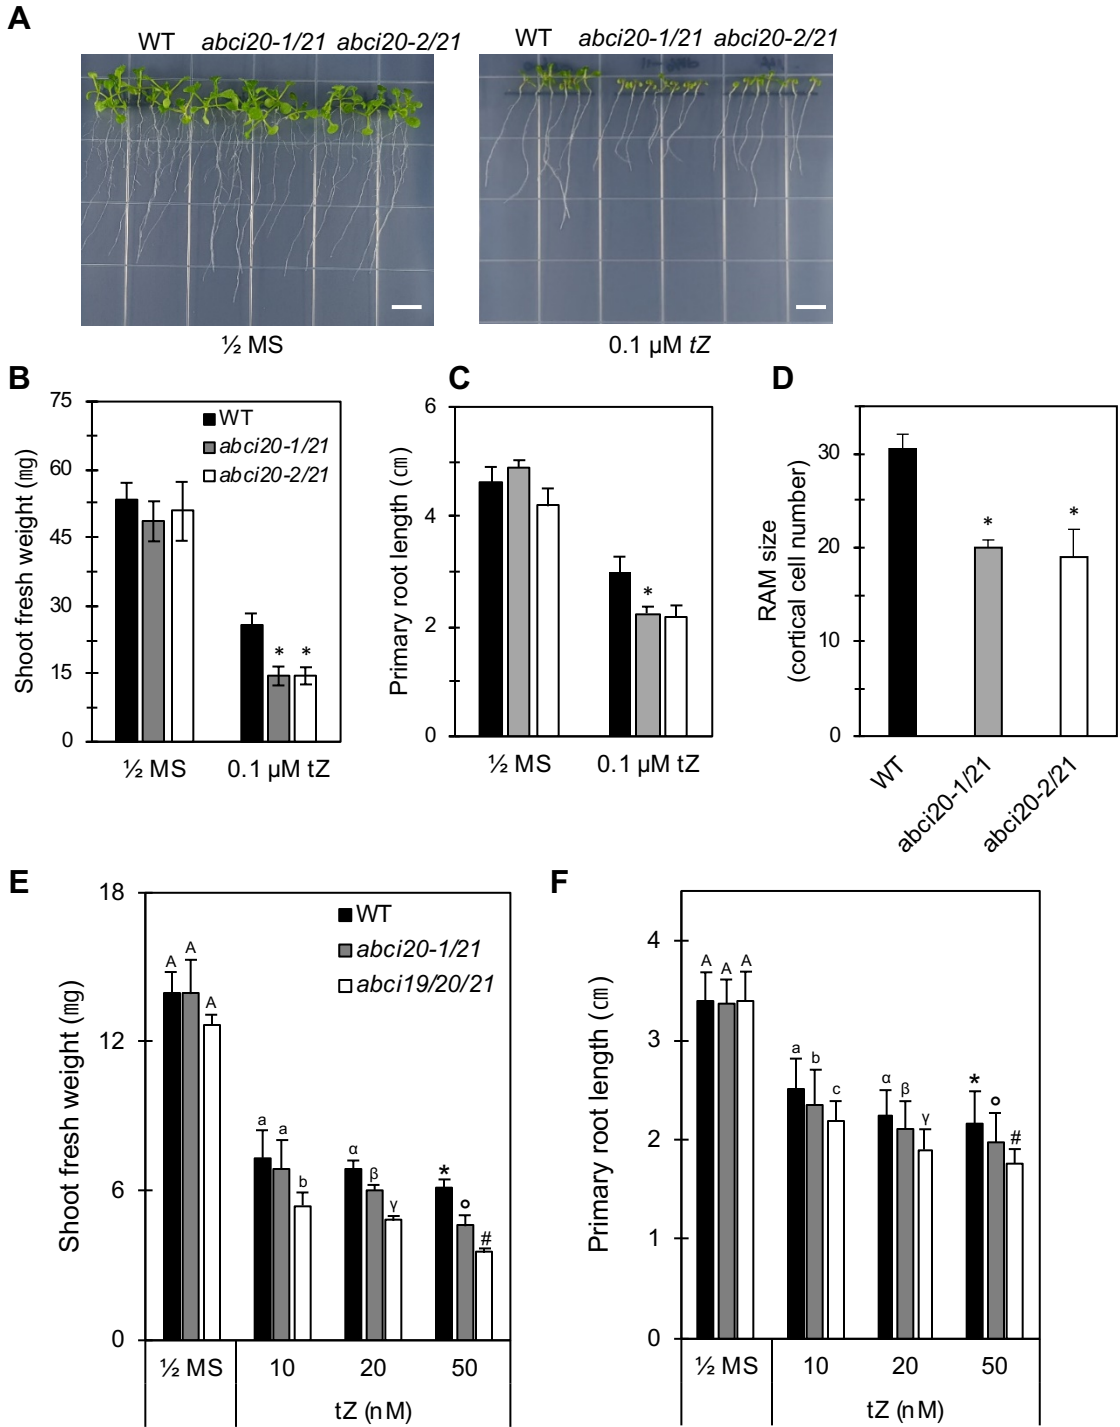

**Supplemental Figure S3.** Enhanced cytokinin sensitivity of *abci20 abci21* mutants.

(a) Twelve-day-old seedlings grown on  $\frac{1}{2}$  MS agar plates without ( $\frac{1}{2}$  MS) or with 0.1  $\mu$ M *trans*-zeatin (tZ) supplementation. Scale bars = 1 cm.

(b, c) Total shoot fresh weight per plate (b) and the primary root length (c) quantified from 12-day-old seedlings. Combined data from three independent experiments (7 biological replicates) are presented. Asterisks indicate statistically significant differences from the wild type (WT) value (\*;  $p < 0.03$ , Student's *t*-test).

(d) Number of cortical cells in root apical meristem (RAM) counted from root tip images of 8-day-old seedlings. Representative data (mean values  $\pm$ SD) are given ( $n=3$ ). Asterisks indicate statistically significant differences (\*;  $p < 0.03$ , Student's *t*-test).

(e, f) Comparison of seedling growth between *abci20 abci21* (*abci20-1/21*) and *abci19 abci20 abci21* (*abci19/20/21-1*) in the absence or presence of tZ (10, 20, 50 nM). Values of shoot fresh weight (e) and primary root length (f) were quantified from 9-day-old seedlings. Combined data (mean values  $\pm$ SD) from two independent experiments (total 8 biological replicates) are given. Different letters and symbols indicate significant differences between genotypes in each treatment condition determined by one-way ANOVA followed by Tukey's honest significant difference test ( $P < 0.05$ ).
